# Supplementary material for: Non-Invasive Estimation of Left Ventricular Filling Pressure Based on Left Atrial Area Strain Measured With Transthoracic 3-Dimensional Speckle Tracking Echocardiography in Patients With Coronary Artery Disease
Source: PubMed Central journal article supplement — Circ Rep. 2021 Aug 20;3(9):520–9. doi: 10.1253/circrep.CR-21-0083 (PMC8423614; doi:10.1253/circrep.cr-21-0083), 2021-08-20
Supplement: circrep-3-520-s001.pdf [file circrep-3-520-s001.pdf]

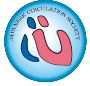

---

**Non-Invasive Estimation of Left Ventricular Filling Pressure  
Based on Left Atrial Area Strain Measured With  
Transthoracic 3-Dimensional Speckle Tracking  
Echocardiography in Patients With  
Coronary Artery Disease**

---

Tomoyuki Banno, MD; Kazuaki Wakami, MD; Shohei Kikuchi, MD;  
Hiroshi Fujita, MD; Toshihiko Goto, MD; Hidekatsu Fukuta, MD;  
Yoshihiro Seo, MD; Nobuyuki Ohte, MD

**Supplementary Table 1. Univariate Correlation Analyses Between 3D-Derived 2D Strain Parameters and LVEDP or mLVDP in Patients With vs. Without CAD, LCx Lesion, or PMI**

| Variable                     | LVEDP                   |         |                               |         | mLVDP                   |         |                               |         |
|------------------------------|-------------------------|---------|-------------------------------|---------|-------------------------|---------|-------------------------------|---------|
|                              | All patients            |         | Patients with LVEF $\geq$ 50% |         | All patients            |         | Patients with LVEF $\geq$ 50% |         |
|                              | Correlation coefficient | P value | Correlation coefficient       | P value | Correlation coefficient | P value | Correlation coefficient       | P value |
| GLAS-r (%)                   | -0.63                   | <0.001  | -0.60                         | <0.001  | -0.70                   | <0.001  | -0.66                         | <0.001  |
| With CAD (n = 62)            | -0.59                   | <0.001  | -0.53                         | <0.001  | -0.68                   | <0.001  | -0.61                         | <0.001  |
| Without CAD (n = 13)         | -0.69                   | <0.001  | -0.69                         | 0.009   | -0.79                   | <0.001  | -0.79                         | 0.001   |
| With LCx lesion (n = 34)     | -0.45                   | 0.008   | -0.42                         | 0.021   | -0.60                   | <0.001  | -0.48                         | 0.007   |
| Without LCx lesion (n = 41)  | -0.74                   | <0.001  | -0.69                         | <0.001  | -0.78                   | <0.001  | -0.79                         | <0.001  |
| With PMI (n = 27)            | -0.60                   | 0.001   | -0.54                         | 0.017   | -0.76                   | <0.001  | -0.66                         | 0.002   |
| Without PMI (n = 48)         | -0.52                   | <0.001  | -0.52                         | <0.001  | -0.58                   | <0.001  | -0.58                         | <0.001  |
| With lateral PMI (n = 6)     | -0.27                   | 0.60    | NA                            | NA      | -0.79                   | 0.064   | NA                            | NA      |
| Without lateral PMI (n = 69) | -0.62                   | <0.001  | -0.56                         | <0.001  | -0.67                   | <0.001  | -0.64                         | <0.001  |
| GLAS-ct (%)                  | 0.65                    | <0.001  | 0.62                          | <0.001  | 0.70                    | <0.001  | 0.69                          | <0.001  |
| With CAD                     | 0.65                    | <0.001  | 0.62                          | <0.001  | 0.70                    | <0.001  | 0.68                          | <0.001  |
| Without CAD                  | 0.65                    | <0.001  | 0.65                          | 0.017   | 0.64                    | <0.001  | 0.64                          | 0.018   |
| With LCx lesion              | 0.56                    | 0.001   | 0.52                          | 0.003   | 0.64                    | <0.001  | 0.56                          | 0.001   |
| Without LCx lesion           | 0.73                    | <0.001  | 0.73                          | <0.001  | 0.74                    | <0.001  | 0.80                          | <0.001  |
| With PMI                     | 0.79                    | <0.001  | 0.82                          | <0.001  | 0.82                    | <0.001  | 0.91                          | <0.001  |
| Without PMI                  | 0.51                    | <0.001  | 0.51                          | <0.001  | 0.58                    | <0.001  | 0.58                          | <0.001  |
| With lateral PMI             | 0.77                    | 0.074   | NA                            | NA      | 0.93                    | 0.007   | NA                            | NA      |
| Without lateral PMI          | 0.62                    | <0.001  | 0.59                          | <0.001  | 0.66                    | <0.001  | 0.67                          | <0.001  |

|                     |       |        |       |        |       |        |       |        |
|---------------------|-------|--------|-------|--------|-------|--------|-------|--------|
| gALS-r              | -0.41 | <0.001 | -0.34 | 0.006  | -0.54 | <0.001 | -0.44 | <0.001 |
| With CAD            | -0.37 | 0.003  | -0.29 | 0.039  | -0.49 | <0.001 | -0.35 | 0.010  |
| Without CAD         | -0.56 | 0.047  | -0.56 | 0.047  | -0.74 | 0.004  | -0.74 | 0.004  |
| With LCx lesion     | -0.23 | 0.18   | -0.18 | 0.34   | -0.45 | 0.008  | -0.29 | 0.12   |
| Without LCx lesion  | -0.58 | <0.001 | -0.50 | 0.002  | -0.62 | <0.001 | -0.56 | <0.001 |
| With PMI            | -0.38 | 0.051  | -0.32 | 0.19   | -0.58 | 0.002  | -0.40 | 0.09   |
| Without PMI         | -0.28 | 0.051  | -0.28 | 0.054  | -0.39 | 0.006  | -0.39 | 0.007  |
| With lateral PMI    | 0.11  | 0.83   | NA    | NA     | -0.51 | 0.30   | NA    | NA     |
| Without lateral PMI | -0.43 | <0.001 | -0.36 | 0.004  | -0.51 | <0.001 | -0.46 | <0.001 |
| gALS-ct             | 0.49  | <0.001 | 0.45  | <0.001 | 0.55  | <0.001 | 0.52  | <0.001 |
| With CAD            | 0.50  | <0.001 | 0.45  | 0.001  | 0.54  | <0.001 | 0.50  | <0.001 |
| Without CAD         | 0.43  | 0.14   | 0.43  | 0.14   | 0.54  | 0.055  | 0.54  | 0.055  |
| With LCx lesion     | 0.36  | 0.039  | 0.30  | 0.10   | 0.51  | 0.002  | 0.40  | 0.027  |
| Without LCx lesion  | 0.60  | <0.001 | 0.59  | <0.001 | 0.58  | <0.001 | 0.62  | <0.001 |
| With PMI            | 0.49  | 0.01   | 0.38  | 0.11   | 0.52  | 0.005  | 0.43  | 0.07   |
| Without PMI         | 0.42  | 0.003  | 0.42  | 0.004  | 0.50  | <0.001 | 0.50  | <0.001 |
| With lateral PMI    | 0.15  | 0.78   | NA    | NA     | 0.54  | 0.27   | NA    | NA     |
| Without lateral PMI | 0.50  | <0.001 | 0.48  | <0.001 | 0.53  | <0.001 | 0.53  | <0.001 |
| gACS-r              | -0.58 | <0.001 | -0.52 | <0.001 | -0.65 | <0.001 | -0.60 | <0.001 |
| With CAD            | -0.57 | <0.001 | -0.52 | <0.001 | -0.64 | <0.001 | -0.57 | <0.001 |
| Without CAD         | -0.48 | 0.10   | -0.48 | 0.095  | -0.69 | 0.009  | -0.69 | 0.009  |
| With LCx lesion     | -0.48 | 0.005  | -0.45 | 0.014  | -0.57 | <0.001 | -0.46 | 0.010  |
| Without LCx lesion  | -0.67 | <0.001 | -0.61 | <0.001 | -0.72 | <0.001 | -0.74 | <0.001 |
| With PMI            | -0.61 | 0.001  | -0.56 | 0.013  | -0.73 | <0.001 | -0.68 | 0.001  |

|                     |       |        |       |        |       |        |       |        |
|---------------------|-------|--------|-------|--------|-------|--------|-------|--------|
| Without PMI         | -0.47 | 0.001  | -0.47 | 0.001  | -0.52 | <0.001 | -0.52 | <0.001 |
| With lateral PMI    | -0.31 | 0.54   | NA    | NA     | -0.75 | 0.09   | NA    | NA     |
| Without lateral PMI | -0.58 | <0.001 | -0.52 | <0.001 | -0.62 | <0.001 | -0.59 | <0.001 |
| gACS-ct             | 0.61  | <0.001 | 0.58  | <0.001 | 0.66  | <0.001 | 0.65  | <0.001 |
| With CAD            | 0.60  | <0.001 | 0.57  | <0.001 | 0.64  | <0.001 | 0.63  | <0.001 |
| Without CAD         | 0.58  | 0.038  | 0.58  | 0.038  | 0.64  | 0.019  | 0.64  | 0.019  |
| With LCx lesion     | 0.56  | <0.001 | 0.53  | 0.002  | 0.61  | <0.001 | 0.54  | 0.002  |
| Without LCx lesion  | 0.66  | <0.001 | 0.64  | <0.001 | 0.70  | <0.001 | 0.75  | <0.001 |
| With PMI            | 0.74  | <0.001 | 0.79  | <0.001 | 0.77  | <0.001 | 0.88  | <0.001 |
| Without PMI         | 0.46  | 0.001  | 0.46  | 0.001  | 0.53  | <0.001 | 0.53  | <0.001 |
| With lateral PMI    | 0.66  | 0.15   | NA    | NA     | 0.74  | 0.09   | NA    | NA     |
| Without lateral PMI | 0.57  | <0.001 | 0.54  | <0.001 | 0.62  | <0.001 | 0.63  | <0.001 |

LV, left ventricular; EDP, end-diastolic pressure; mLVD, mean left ventricular diastolic pressure; CAD, coronary artery disease newly diagnosed in this study; LCx, left circumflex coronary artery; PMI, prior myocardial infarction; EF, ejection fraction; GLAS-r and GLAS-ct, global left atrial area strain during reservoir phase and during contraction phase, respectively; gALS-r, global left atrial longitudinal strain during reservoir phase; gALS-ct, global left atrial longitudinal strain during contraction phase; gACS-r, global left atrial circumferential strain during reservoir phase; gACS-ct, atrial circumferential strain during contraction phase; NA, not available.

**Supplementary Table 2. Logistic Regression Analyses for Diagnosing Both Elevated LVEDP and mLVDP in all Patients**

| Variable                 | LVEDP ≥16 mmHg |           |         |              |        |         |         |        |         | mLVDP ≥12 mmHg |        |         |              |        |         |           |        |         |  |  |
|--------------------------|----------------|-----------|---------|--------------|--------|---------|---------|--------|---------|----------------|--------|---------|--------------|--------|---------|-----------|--------|---------|--|--|
|                          | Univariate     |           |         | Multivariate |        |         |         |        |         | Univariate     |        |         | Multivariate |        |         |           |        |         |  |  |
|                          | OR             | 95% CI    | P value | Model 1      |        |         | Model 2 |        |         | OR             | 95% CI | P value | Model 3      |        |         | Model 4   |        |         |  |  |
|                          |                |           |         | OR           | 95% CI | P value | OR      | 95% CI | P value |                |        |         | OR           | 95% CI | P value | OR        | 95% CI | P value |  |  |
| Age                      | 1.00           | 0.95–1.05 | 0.96    |              |        |         |         |        |         |                |        | 0.98    | 0.91–1.05    | 0.49   |         |           |        |         |  |  |
| Male                     | 1.17           | 0.43–3.16 | 0.76    |              |        |         |         |        |         |                |        | 0.93    | 0.21–4.10    | 0.93   |         |           |        |         |  |  |
| Hypertension             | 1.00           | 0.37–2.75 | 0.99    |              |        |         |         |        |         |                |        | 1.67    | 0.32–8.74    | 0.54   |         |           |        |         |  |  |
| Diabetes                 | 0.84           | 0.32–2.17 | 0.71    |              |        |         |         |        |         |                |        | 1.20    | 0.29–4.89    | 0.80   |         |           |        |         |  |  |
| Dyslipidemia             | 1.35           | 0.37–4.97 | 0.65    |              |        |         |         |        |         |                |        | 0.64    | 0.12–3.52    | 0.60   |         |           |        |         |  |  |
| CAD                      | 4.53           | 0.93–22.2 | 0.06    |              |        |         |         |        |         |                |        | -       | -            | -      |         |           |        |         |  |  |
| PMI                      | 1.69           | 0.65–4.42 | 0.28    |              |        |         |         |        |         |                |        | 0.88    | 0.20–3.82    | 0.86   |         |           |        |         |  |  |
| Paroxysmal Af or AFL     | 0.50           | 0.05–5.05 | 0.56    |              |        |         |         |        |         |                |        | -       | -            | -      |         |           |        |         |  |  |
| E (per 10 cm/s increase) | 1.76           | 1.24–2.50 | 0.002   |              |        |         |         |        |         |                |        | 1.93    | 1.25–2.99    | 0.003  | 1.76    | 1.09–2.83 | 0.02   |         |  |  |

|                                         |      |           |        |      |           |        |      |           |        |           |           |       |      |           |       |      |           |       |
|-----------------------------------------|------|-----------|--------|------|-----------|--------|------|-----------|--------|-----------|-----------|-------|------|-----------|-------|------|-----------|-------|
| E/A ratio (per 0.1 increase)            | 1.45 | 1.14–1.83 | 0.002  | 1.74 | 1.22–2.48 | 0.002  |      |           | 1.49   | 1.11–2.01 | 0.009     |       |      |           |       |      |           |       |
| DT (per 10 ms increase)                 | 0.93 | 0.85–1.01 | 0.099  |      |           |        |      |           | 0.88   | 0.76–1.01 | 0.07      |       |      |           |       |      |           |       |
| E/ mean e' ratio (per 1 increase)       | 1.18 | 1.01–1.39 | 0.04   |      |           |        |      |           | 1.23   | 1.01–1.49 | 0.04      |       |      |           |       |      |           |       |
| LAVI (per 1 ml/m <sup>2</sup> increase) | 1.09 | 1.00–1.03 | 0.003  |      |           |        |      |           | 1.08   | 1.01–1.15 | 0.03      |       |      |           |       |      |           |       |
| LVMI (per 1 g/m <sup>2</sup> increase)  | 1.01 | 1.00–1.03 | 0.19   |      |           |        |      |           | 1.01   | 0.99–1.03 | 0.30      |       |      |           |       |      |           |       |
| RWT (per 0.1 increase)                  | 0.79 | 0.46–1.35 | 0.38   |      |           |        |      |           | 0.53   | 0.22–1.27 | 0.15      |       |      |           |       |      |           |       |
| GLAS-r (per 10% increase)               | 0.43 | 0.29–0.63 | <0.001 | 0.35 | 0.21–0.58 | <0.001 | -    | -         | -      | 0.48      | 0.29–0.80 | 0.004 | 0.54 | 0.32–0.89 | 0.015 | -    | -         | -     |
| GLAS-ct (per 10% increase)              | 4.70 | 2.35–9.40 | <0.001 | -    | -         | -      | 4.70 | 2.35–9.40 | <0.001 | 4.92      | 1.79–13.6 | 0.002 | -    | -         | -     | 4.92 | 1.79–13.6 | 0.002 |

Model 1: E/A ratio, E/mean e', LAVI, and GLAS-r were selected as possible independent variables

Model 2: E/A ratio, E/mean e', LAVI, and GLAS-ct were selected as possible independent variables

Model 3: E velocity, E/mean e', LAVI, and GLAS-r were selected as possible independent variables

Model 4: E velocity, E/mean e', LAVI, and GLAS-ct were selected as possible independent variables

OR, odds ratio; CI, confidence interval; Af, atrial fibrillation; AFL, atrial flutter; E and A, early and late peak velocity of mitral inflow, respectively; DT, deceleration time of E wave; mean e', the averaged value of peak velocities obtained at both the septal and lateral annual corners during early diastole; LAVI, left atrial volume index; LVMI, left ventricular mass index; RWT, relative wall thickness; other abbreviations as in Supplementary Table 1.
